# Supplementary material for: Discovery of GLO1 New Related Genes and Pathways by RNA-Seq on A2E-Stressed Retinal Epithelial Cells Could Improve Knowledge on Retinitis Pigmentosa
Source: MDPI journal article supplement (doi:10.3390/antiox9050416), 2020-05-13
Supplement: s1 [file s1]

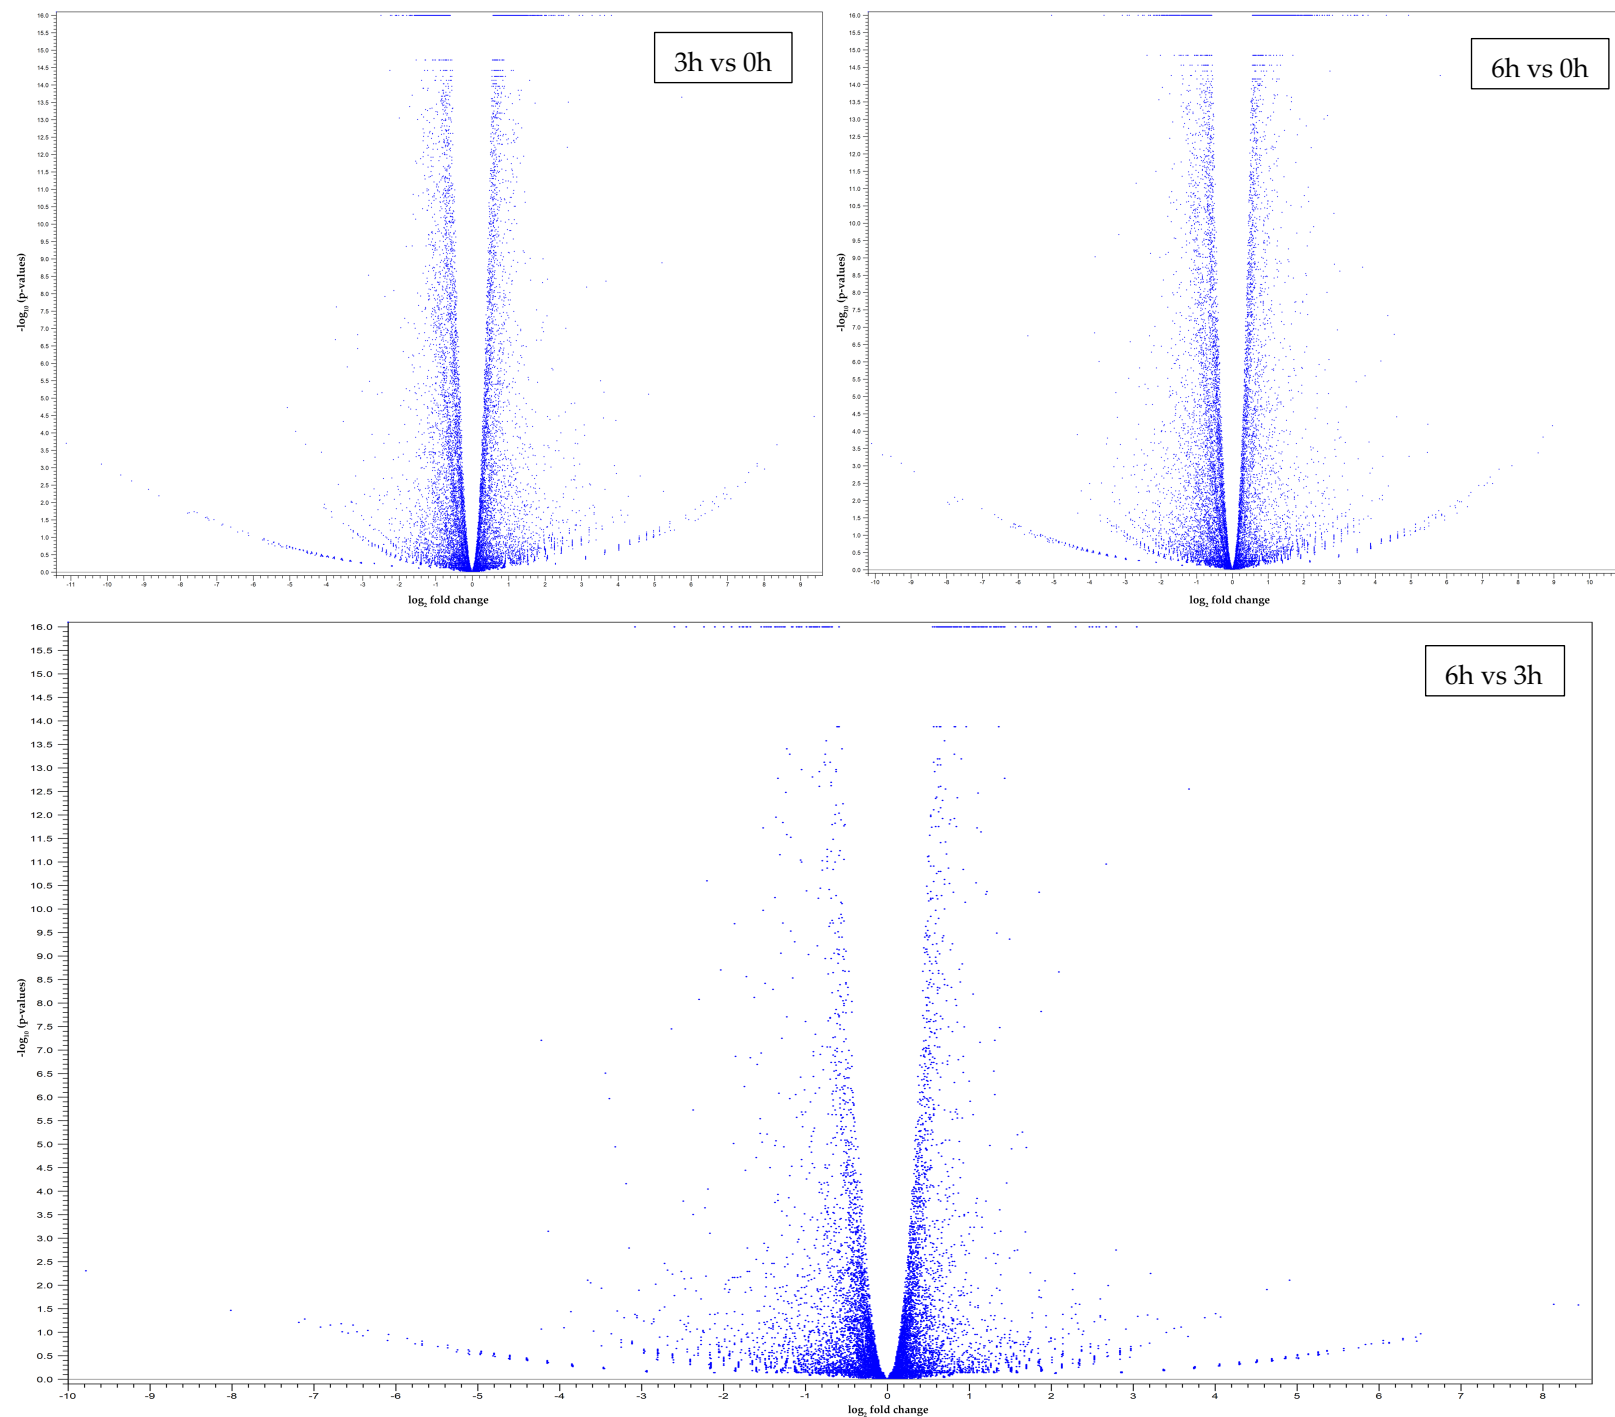

**Figure S1. Volcano plots based on p-values and fold-changes produced by Limma.** The volcano plot shows the relationship between the p-values of Limma included statistical test and the magnitude of the difference in expression values of the samples in the groups. On the y-axis, the  $-\log_{10}$  p-values are plotted, while the  $\log_2$  of the values in the “fold change” (or “Weighted fold change”) are plotted on the x-axis. The larger the difference in expression of a gene, the more extreme it's point will lie on the x-axis. The more significant the difference, the smaller the p-value and thus the higher the  $-\log_{10}(p)$  value. Thus, points for genes with highly significant differences lie high in the plot, and it is clear that many analyzed genes differ before and after applied treatment.
